# Supplementary material
Source: Springer Nature journal article supplement (https://www.springermedizin.de/resource/supplementary/12913_2012_2554_MOESM3_ESM.pdf/9532022)

## Lilongwe district

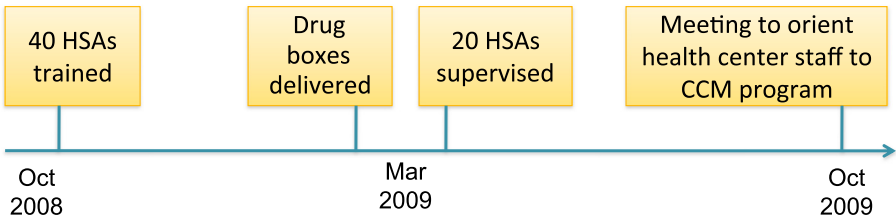

## Mzimba district

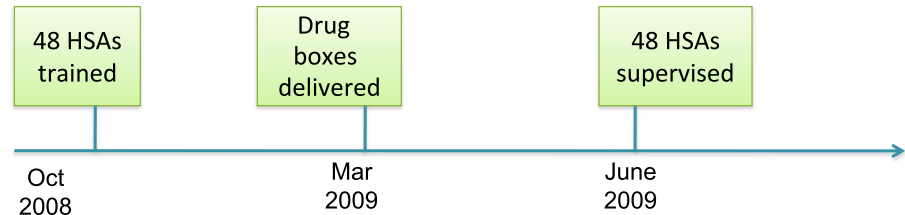

Supplement: MOESM3 [file 9532022]
